# Supplementary material
Source: HighWire-hosted journal article supplement (https://erj.ersjournals.com/content/51/4/1702114)
Supplement: inline-supplementary-material-1 [file inline-supplementary-material-1.pdf]

# Multimorbidity medications and poor asthma prognosis

Sébastien Chanoine, Margaux Sanchez, Isabelle Pin, Sofia Temam, Nicole Le Moual,

Agnès Fournier, Christophe Pison, Jean Bousquet, Pierrick Bedouch,

Marie-Christine Boutron-Ruault, Raphaëlle Varraso and Valérie Siroux

## Supplementary material

### Methods

#### *Asthma characteristics and adverse asthma events*

Current asthma was defined by the self-report of asthma symptoms or the use of asthma treatment over the previous 12 months. Late-onset asthma was defined as a disease onset (*i.e.* age at first asthma attack) after 40 years of age [E1]. COPD was defined by a positive answer to “Did a doctor ever tell you that you had one of these COPD forms: chronic bronchitis, emphysema, COPD (unspecified form)?”, a definition previously validated in a cohort of health professionals in the United States [E2]. The term ACO was applied to women with both self-report of asthma and COPD. Asthma treatment level was assessed from the MGEN database (reimbursement drug database) according to the GINA (Global Initiative for Asthma) 2016 classification [E3]: 1) Step 1, no asthma maintenance therapy (*i.e.* no daily use of inhaled corticosteroids (ICS) and/or leukotriene receptor antagonists (LTRA) over the 12 months that preceded the Asthma-E3N questionnaire), 2) Step 2, low mean daily dose of ICS or LTRA or xanthines alone, 3) Step 3, either a) low mean daily dose of ICS associated with long-acting beta<sub>2</sub>-agonists or LTRA or theophylline or b) medium/high mean daily dose of ICS, 4) Step 4, medium/high mean daily dose of ICS associated with long-acting beta<sub>2</sub>-

agonists or high mean daily dose of ICS associated with LTRA or theophylline, 5) Step 5, add-on treatment. Steps 4 and 5 were grouped as high asthma maintenance therapy, and steps 2 and 3 as low asthma maintenance therapy. Oral corticosteroids were not included in this classification because of their wide-range of indications, particularly in the elderly, as tiotropium introduced in the GINA 2016 classification as add-on therapy for asthma with a history of exacerbations.

Asthma control was assessed by the validated Asthma Control Test (ACT), a patient-based tool relying on symptom frequency, rescue therapy use, sleep interference, activity limitation, and self-rating of control over the previous month [E4]. Women were classified into uncontrolled ( $ACT \leq 19$ ) and controlled asthma ( $ACT > 19$ ). Asthma attack was defined by a positive answer to “Have you had an asthma attack over the previous 12 months?”. Asthma exacerbation was defined by the report of asthma attacks lasting at least two days in the previous 12 months. From the specific Asthma Quality of Life Questionnaire (AQLQ), which covers four domains (“symptoms”, “activity limitation”, “emotional function”, and susceptibility to “environmental exposure”) assessed over the previous two weeks, the total AQLQ score was computed as the mean of all 32 questions (a lower score being associated with a lower health-related quality of life) [E5].

#### *Latent class analysis*

Latent class analysis is a data-driven approach to identify asthma groups characterised by specific multimorbidity-related medication profiles. It estimates two sets of parameters: i) the conditional probabilities, which represent the probabilities of belonging to a cluster given specific characteristics, and ii) the posterior probabilities of cluster membership for each individual (derived from the conditional probabilities), which allow accounting for the uncertainty in the cluster membership. The number of profiles was determined using the

Akaike information criterion and the Bayesian information criterion [E6]. Latent class analysis was developed with: i) the 21 drug classes *a priori* linked to asthma-related multimorbidity grouped in ten categories (*i.e.* R03 “drugs for obstructive airway diseases” for respiratory diseases; R06 “antihistamines for systemic use” for allergy; A02 “drugs for acid related disorders” for gastro-oesophageal reflux disease; R01 “nasal preparations” for nasal polyps and rhinosinusitis; N05 “psycholeptics”, N06A “antidepressants”, and N06C “psycholeptics and psychoanaleptics in combination” for psychological disorders; J01 “antibacterials for systemic use”, J02 “antimycotics for systemic use”, J04 “antimycobacterials”, and J05 “antivirals” for infections; G03 “sex hormones and modulators of the genital system” for hormonal disorders; A10 “drugs used in diabetes” for diabetes; C01 “cardiac therapy”, C02 “antihypertensives”, C03 “diuretics”, C04 “peripheral vasodilators”, C07 “beta blocking agents”, C08 “calcium channel blockers”, and C09 “agents acting on the renin-angiotensin system” for cardiovascular diseases; C10 “lipid modifying agents” for dyslipidaemia which is included in metabolic syndrome), ii) drug classes linked with asthma medications identified by the network graph among women with ever-asthma and iii) three clinical and environmental factors which cannot be assessed by drug classes (body mass index for obesity, sleep apnoea syndrome, and smoking status).

### *Multiple imputation*

Multiple imputation was performed to handle missing data derived from the Asthma-E3N questionnaire. The hypothesis of missing completely at random as missing data pattern was refuted ( $p < 0.0001$ ). The rejection of this latter hypothesis and the low proportion of missing data (10.3%) in our dataset allowed us to assume that missing data followed a missing at random mechanism, and thus to use multiple imputation to handle missing data. We conducted 20 imputations for model performance as recommended for dataset with 10% to 30% of missing information [E7].

## Results

**Table E1.** Classification of the drug classes reimbursed in 1% or more of women with ever-asthma from the Asthma-E3N study and comparison with women without asthma.

| Label |                                                                     | Women with ever-asthma<br>(n=4,328) |        | Women without asthma<br>(n=13,130) |        |
|-------|---------------------------------------------------------------------|-------------------------------------|--------|------------------------------------|--------|
|       |                                                                     | n                                   | (%)    | n                                  | (%)    |
| N02B  | Other analgesics and antipyretics                                   | 3,126                               | (72.2) | 8,995                              | (68.5) |
| M01A  | Antiinflammatory/antirheumatic products, non steroids               | 2,751                               | (63.6) | 7,957                              | (60.6) |
| R06A  | Antihistamines for systemic use                                     | 2,280                               | (52.7) | 3,805                              | (29.0) |
| A02B  | Drugs for peptic ulcer and gastro-oesophageal reflux disease (GORD) | 2,231                               | (51.5) | 5,475                              | (41.7) |
| J07B  | Viral vaccines                                                      | 2,171                               | (50.2) | 5,485                              | (41.8) |
| R03A  | Adrenergics, inhalants                                              | 2,169                               | (50.1) | 786                                | (6.0)  |
| H02A  | Corticosteroids for systemic use, plain                             | 2,071                               | (47.9) | 4,332                              | (33.0) |
| R01A  | Decongestants and other nasal preparations for topical use          | 1,941                               | (44.8) | 4,128                              | (31.4) |
| J01C  | Beta-lactam antibacterials, penicillins                             | 1,743                               | (40.3) | 4,314                              | (32.9) |
| A11C  | Vitamins A and D, including combinations of the two                 | 1,724                               | (39.8) | 5,125                              | (39.0) |
| M02A  | Topical products for joint and muscular pain                        | 1,476                               | (34.1) | 4,016                              | (30.6) |
| N02A  | Opioids                                                             | 1,459                               | (33.7) | 3,049                              | (23.2) |
| N05B  | Anxiolytics                                                         | 1,400                               | (32.3) | 3,473                              | (26.5) |
| D08A  | Antiseptics and disinfectants                                       | 1,397                               | (32.3) | 4,197                              | (32.0) |
| C10A  | Cholesterol and triglyceride reducers                               | 1,353                               | (31.3) | 3,876                              | (29.5) |
| J01F  | Macrolides, lincosamides, and streptogramins                        | 1,261                               | (29.1) | 2,560                              | (19.5) |
| G03C  | Estrogens                                                           | 1,258                               | (29.1) | 3,613                              | (27.5) |
| A03A  | Drugs for functional bowel disorders                                | 1,250                               | (28.9) | 3,232                              | (24.6) |
| D07A  | Corticosteroids, plain                                              | 1,222                               | (28.2) | 3,210                              | (24.4) |
| D01A  | Antifungals for topical use                                         | 1,157                               | (26.7) | 3,303                              | (25.2) |
| A12A  | Calcium                                                             | 1,114                               | (25.7) | 3,220                              | (24.5) |
| A06A  | Laxatives                                                           | 1,109                               | (25.6) | 3,091                              | (23.5) |
| R03B  | Other drugs for obstructive airway diseases, inhalants              | 1,108                               | (25.6) | 979                                | (7.5)  |
| A01A  | Stomatological preparations                                         | 1,033                               | (23.9) | 2,660                              | (20.3) |
| R05D  | Cough suppressants, excluding combinations with expectorants        | 1,007                               | (23.3) | 2,249                              | (17.1) |
| J01D  | Other beta-lactam antibacterials                                    | 969                                 | (22.4) | 2,076                              | (15.8) |
| J01M  | Quinolone antibacterials                                            | 954                                 | (22.0) | 2,318                              | (17.7) |
| B01A  | Antithrombotic agents                                               | 921                                 | (21.3) | 2,872                              | (21.9) |
| S01G  | Decongestants and antiallergics                                     | 911                                 | (21.0) | 1,543                              | (11.8) |
| S01A  | Antiinfectives                                                      | 844                                 | (19.5) | 2,323                              | (17.7) |
| M03B  | Muscle relaxants, centrally acting agents                           | 835                                 | (19.3) | 2,303                              | (17.5) |
| S01X  | Other ophthalmologicals                                             | 815                                 | (18.8) | 2,377                              | (18.1) |
| N05C  | Hypnotics and sedatives                                             | 807                                 | (18.6) | 2,113                              | (16.1) |
| N06A  | Antidepressants                                                     | 803                                 | (18.6) | 2,033                              | (15.5) |
| A03F  | Propulsives                                                         | 790                                 | (18.3) | 2,063                              | (15.7) |
| H03A  | Thyroid preparations                                                | 775                                 | (17.9) | 1972                               | (15.0) |

|      |                                                                            |     |        |       |        |
|------|----------------------------------------------------------------------------|-----|--------|-------|--------|
| M05B | Drugs affecting bone structure and mineralisation                          | 731 | (16.9) | 2,149 | (16.4) |
| S01C | Antiinflammatory agents and antiinfectives in combination                  | 679 | (15.7) | 1,783 | (13.6) |
| Z    | Others                                                                     | 662 | (15.3) | 1,786 | (13.6) |
| C09C | Angiotensin II antagonists, plain                                          | 581 | (13.4) | 1,464 | (11.2) |
| D06A | Antibiotics for topical use                                                | 575 | (13.3) | 1,626 | (12.4) |
| J01X | Other antibacterials                                                       | 559 | (12.9) | 1,551 | (11.8) |
| A07D | Antipropulsives                                                            | 535 | (12.4) | 1,170 | (8.9)  |
| A02A | Antiacids                                                                  | 519 | (12.0) | 1,362 | (10.4) |
| R03D | Other systemic drugs for obstructive airway diseases                       | 511 | (11.8) | 176   | (1.3)  |
| V08A | X-ray contrast media, iodinated                                            | 506 | (11.7) | 1,427 | (10.9) |
| D02A | Emollients and protectives                                                 | 493 | (11.4) | 1,290 | (9.8)  |
| N01B | Anaesthetics, local                                                        | 490 | (11.3) | 1,341 | (10.2) |
| J07C | Bacterial and viral vaccines, combined                                     | 482 | (11.1) | 1,568 | (11.9) |
| J01R | Combinations of antibacterials                                             | 470 | (10.9) | 1,393 | (10.6) |
| C07A | Beta blocking agents                                                       | 463 | (10.7) | 2,148 | (16.4) |
| A07B | Intestinal adsorbents                                                      | 456 | (10.5) | 1,269 | (9.7)  |
| S01B | Antiinflammatory agents                                                    | 441 | (10.2) | 1,207 | (9.2)  |
| C09D | Angiotensin II antagonists, combinations                                   | 437 | (10.1) | 1,040 | (7.9)  |
| S01E | Antiglaucoma preparations and miotics                                      | 422 | (9.8)  | 1,354 | (10.3) |
| J07A | Bacterial vaccines                                                         | 408 | (9.4)  | 607   | (4.6)  |
| N07C | Antivertigo preparations                                                   | 396 | (9.1)  | 1,027 | (7.8)  |
| D06B | Chemotherapeutics for topical use                                          | 380 | (8.8)  | 1,067 | (8.1)  |
| N03A | Antiepileptics                                                             | 379 | (8.8)  | 1,075 | (8.2)  |
| C05A | Agents for treatment of haemorrhoids and anal fissures for topical use     | 373 | (8.6)  | 1,049 | (8.0)  |
| C08C | Selective calcium channel blockers with mainly vascular effects            | 370 | (8.5)  | 991   | (7.5)  |
| G01A | Antiinfectives and antiseptics, excluding combination with corticosteroids | 319 | (7.4)  | 636   | (4.8)  |
| C01E | Other cardiac preparations                                                 | 312 | (7.2)  | 935   | (7.1)  |
| A07X | Other antidiarrhoeals                                                      | 311 | (7.2)  | 869   | (6.6)  |
| G03D | Progestogens                                                               | 301 | (7.0)  | 882   | (6.7)  |
| S01F | Mydriatics and cycloplegics                                                | 295 | (6.8)  | 860   | (6.5)  |
| S02C | Corticosteroids and antiinfectives in combination                          | 292 | (6.7)  | 721   | (5.5)  |
| V08C | Magnetic resonance imaging contrast media                                  | 292 | (6.7)  | 795   | (6.1)  |
| J05A | Direct acting antivirals                                                   | 288 | (6.7)  | 751   | (5.7)  |
| N06D | Anti-dementia drugs                                                        | 272 | (6.3)  | 739   | (5.6)  |
| G03F | Progestogens and estrogens in combination                                  | 258 | (6.0)  | 748   | (5.7)  |
| A10B | Blood glucose lowering drugs, excluding insulins                           | 255 | (5.9)  | 450   | (3.4)  |
| B05B | I.V. solutions                                                             | 239 | (5.5)  | 539   | (4.1)  |
| A04A | Antiemetics and antinauseants                                              | 235 | (5.4)  | 634   | (4.8)  |
| C09A | Angiotensin-converting enzyme (ACE) inhibitors, plain                      | 234 | (5.4)  | 803   | (6.1)  |
| C08D | Selective calcium channel blockers with direct cardiac effects             | 232 | (5.4)  | 277   | (2.1)  |
| A12B | Potassium                                                                  | 205 | (4.7)  | 452   | (3.4)  |
| B03A | Iron preparations                                                          | 204 | (4.7)  | 410   | (3.1)  |
| A03E | Antispasmodics and anticholinergics in combination with other drugs        | 201 | (4.6)  | 522   | (4.0)  |
| C01B | Antiarrhythmics, class I and III                                           | 196 | (4.5)  | 450   | (3.4)  |
| P01A | Agents against amoebiasis and other protozoal diseases                     | 194 | (4.5)  | 455   | (3.5)  |
| C09B | Angiotensin-converting enzyme (ACE) inhibitors, combinations               | 177 | (4.1)  | 515   | (3.9)  |

|      |                                                             |     |       |     |       |
|------|-------------------------------------------------------------|-----|-------|-----|-------|
| G04B | Urologicals                                                 | 177 | (4.1) | 430 | (3.3) |
| C03C | High-ceiling diuretics                                      | 173 | (4.0) | 358 | (2.7) |
| G03X | Other sex hormones and modulators of the genital system     | 160 | (3.7) | 436 | (3.3) |
| J02A | Antimycotics for systemic use                               | 158 | (3.7) | 234 | (1.8) |
| C03E | Diuretics and potassium-sparing agents in combination       | 156 | (3.6) | 369 | (2.8) |
| C01D | Vasodilators used in cardiac diseases                       | 144 | (3.3) | 361 | (2.7) |
| M04A | Antigout preparations                                       | 144 | (3.3) | 353 | (2.7) |
| A07A | Intestinal antiinfectives                                   | 142 | (3.3) | 259 | (2.0) |
| S01K | Surgical aids                                               | 140 | (3.2) | 456 | (3.5) |
| N02C | Antimigraine preparations                                   | 138 | (3.2) | 459 | (3.5) |
| R01B | Nasal decongestants for systemic use                        | 134 | (3.1) | 430 | (3.3) |
| J01A | Tetracyclines                                               | 131 | (3.0) | 354 | (2.7) |
| A12C | Other mineral supplements                                   | 123 | (2.8) | 276 | (2.1) |
| C03D | Potassium-sparing agents                                    | 112 | (2.6) | 268 | (2.0) |
| C04A | Peripheral vasodilators                                     | 107 | (2.5) | 288 | (2.2) |
| B03B | Vitamin B12 and folic acid                                  | 100 | (2.3) | 298 | (2.3) |
| L02B | Hormone antagonists and related agents                      | 93  | (2.1) | 349 | (2.7) |
| C03B | Low-ceiling diuretics, excluding thiazides                  | 92  | (2.1) | 221 | (1.7) |
| J01E | Sulfonamides and trimethoprim                               | 91  | (2.1) | 253 | (1.9) |
| C02A | Antiadrenergic agents, centrally acting                     | 88  | (2.0) | 184 | (1.4) |
| N05A | Antipsychotics                                              | 87  | (2.0) | 245 | (1.9) |
| A11H | Other plain vitamin preparations                            | 85  | (2.0) | 271 | (2.1) |
| D10A | Anti-acne preparations for topical use                      | 83  | (1.9) | 225 | (1.7) |
| J01G | Aminoglycoside antibacterials                               | 81  | (1.9) | 116 | (0.9) |
| D01B | Antifungals for systemic use                                | 77  | (1.8) | 240 | (1.8) |
| D07X | Corticosteroids, other combinations                         | 77  | (1.8) | 246 | (1.9) |
| N04B | Dopaminergic agents                                         | 77  | (1.8) | 239 | (1.8) |
| D05A | Antipsoriatics for topical use                              | 68  | (1.6) | 203 | (1.5) |
| R05C | Expectorants, excluding combination with cough suppressants | 68  | (1.6) | 70  | (0.5) |
| N06B | Psychostimulants, agents used for ADHD and nootropics       | 66  | (1.5) | 130 | (1.0) |
| S02A | Antiinfectives                                              | 66  | (1.5) | 192 | (1.5) |
| P02C | Antinematodal agents                                        | 60  | (1.4) | 148 | (1.1) |
| C07B | Beta blocking agents and thiazides                          | 55  | (1.3) | 281 | (2.1) |
| V04C | Other diagnostic agents                                     | 54  | (1.2) | 113 | (0.9) |
| C03A | Low-ceiling diuretics, thiazides                            | 51  | (1.2) | 132 | (1.0) |
| L04A | Immunosuppressants                                          | 46  | (1.1) | 120 | (0.9) |
| C01A | Cardiac glycosides                                          | 43  | (1.0) | 85  | (0.6) |
| C01C | Cardiac stimulants, excluding cardiac glycosides            | 42  | (1.0) | 8   | (0.1) |

**Table E2.** Associations between multimorbidity-related medication profiles identified by latent class analysis and asthma characteristics and adverse asthma events among women with ever-asthma from the Asthma-E3N study.

| Asthma characteristics and adverse asthma events                     | Crude model |                |         | Model adjusted on age |                |         | Model adjusted on asthma treatment level |                |         |
|----------------------------------------------------------------------|-------------|----------------|---------|-----------------------|----------------|---------|------------------------------------------|----------------|---------|
|                                                                      | OR (*β)     | [95%CI] (*±SD) | p-value | OR (*β)               | [95%CI] (*±SD) | p-value | OR (*β)                                  | [95%CI] (*±SD) | p-value |
| <b>Uncontrolled asthma</b>                                           |             |                |         |                       |                |         |                                          |                |         |
| “Few multimorbidity-related medications” profile                     | 1.00        | -              |         | 1.00                  | -              |         | 1.00                                     | -              |         |
| “Predominantly allergic multimorbidity-related medications” profile  | 2.02        | [1.62;2.53]    | <0.0001 | 2.01                  | [1.60;2.52]    | <0.0001 | 1.51                                     | [1.19;1.91]    | 0.0006  |
| “Predominantly metabolic multimorbidity-related medications” profile | 2.59        | [2.04;3.29]    | <0.001  | 2.28                  | [1.78;2.90]    | <0.0001 | 2.20                                     | [1.72;2.81]    | <0.0001 |
| <b>Asthma exacerbations</b>                                          |             |                |         |                       |                |         |                                          |                |         |
| “Few multimorbidity-related medications” profile                     | 1.00        | -              |         | 1.00                  | -              |         | 1.00                                     | -              |         |
| “Predominantly allergic multimorbidity-related medications” profile  | 1.65        | [1.18;2.31]    | 0.004   | 1.64                  | [1.18;2.30]    | 0.004   | 1.46                                     | [1.08;1.99]    | 0.01    |
| “Predominantly metabolic multimorbidity-related medications” profile | 1.36        | [0.90;2.06]    | 0.14    | 1.31                  | [0.90;1.93]    | 0.16    | 1.26                                     | [0.85;1.87]    | 0.24    |
| <b>Asthma attacks</b>                                                |             |                |         |                       |                |         |                                          |                |         |
| “Few multimorbidity-related medications” profile                     | 1.00        | -              |         | 1.00                  | -              |         | 1.00                                     | -              |         |
| “Predominantly allergic multimorbidity-related medications” profile  | 2.23        | [1.85;2.69]    | <0.0001 | 2.23                  | [1.85;2.69]    | <0.0001 | 1.94                                     | [1.60;2.35]    | <0.0001 |
| “Predominantly metabolic multimorbidity-related medications” profile | 2.03        | [1.63;2.52]    | <0.0001 | 2.05                  | [1.65;2.54]    | <0.0001 | 1.87                                     | [1.50;2.32]    | <0.0001 |
| <b>Total asthma quality of life score*</b>                           |             |                |         |                       |                |         |                                          |                |         |
| “Few multimorbidity-related medications” profile                     | 6.35        | ±0.02          | <0.0001 | 6.33                  | ±0.02          | <0.0001 | 6.29                                     | ±0.02          | <0.0001 |
| “Predominantly allergic multimorbidity-related medications” profile  | 5.94        | ±0.03          | <0.0001 | 5.92                  | ±0.03          | <0.0001 | 6.01                                     | ±0.03          | <0.0001 |
| “Predominantly metabolic multimorbidity-related medications” profile | 5.86        | ±0.03          | <0.0001 | 5.82                  | ±0.03          | <0.0001 | 5.87                                     | ±0.03          | <0.0001 |

CI, confidence interval; OR, odds ratio; SD, standard deviation.

**Table E3.** Associations between multimorbidity-related medication profiles identified by latent class analysis and asthma characteristics and asthma adverse events among women with current asthma from the Asthma-E3N study.

| Asthma characteristics and adverse asthma events                     | Crude model |                |         | Model adjusted on age |                |         | Model adjusted on asthma treatment level |                |         |
|----------------------------------------------------------------------|-------------|----------------|---------|-----------------------|----------------|---------|------------------------------------------|----------------|---------|
|                                                                      | OR (*β)     | [95%CI] (*±SD) | p-value | OR (*β)               | [95%CI] (*±SD) | p-value | OR (*β)                                  | [95%CI] (*±SD) | p-value |
| <b>Uncontrolled asthma</b>                                           |             |                |         |                       |                |         |                                          |                |         |
| “Few multimorbidity-related medications” profile                     | 1.00        | -              |         | 1.00                  | -              |         | 1.00                                     | -              |         |
| “Predominantly allergic multimorbidity-related medications” profile  | 1.76        | [1.39;2.24]    | <0.0001 | 1.76                  | [1.38;2.25]    | <0.0001 | 1.38                                     | [1.07;1.77]    | 0.01    |
| “Predominantly metabolic multimorbidity-related medications” profile | 2.16        | [1.67;2.79]    | <0.0001 | 1.92                  | [1.48;2.50]    | <0.0001 | 1.89                                     | [1.46;2.46]    | <0.0001 |
| <b>Asthma exacerbations</b>                                          |             |                |         |                       |                |         |                                          |                |         |
| “Few multimorbidity-related medications” profile                     | 1.00        | -              |         | 1.00                  | -              |         | 1.00                                     | -              |         |
| “Predominantly allergic multimorbidity-related medications” profile  | 1.63        | [1.22;2.16]    | 0.0009  | 1.62                  | [1.22;2.16]    | 0.0009  | 1.46                                     | [1.11;1.94]    | 0.007   |
| “Predominantly metabolic multimorbidity-related medications” profile | 1.30        | [0.92;1.84]    | 0.13    | 1.28                  | [0.92;1.78]    | 0.14    | 1.23                                     | [0.87;1.73]    | 0.23    |
| <b>Asthma attacks</b>                                                |             |                |         |                       |                |         |                                          |                |         |
| “Few multimorbidity-related medications” profile                     | 1.00        | -              |         | 1.00                  | -              |         | 1.00                                     | -              |         |
| “Predominantly allergic multimorbidity-related medications” profile  | 1.71        | [1.40;2.08]    | <0.0001 | 1.71                  | [1.40;2.08]    | <0.0001 | 1.59                                     | [1.30;1.95]    | <0.0001 |
| “Predominantly metabolic multimorbidity-related medications” profile | 1.48        | [1.19;1.85]    | 0.0005  | 1.51                  | [1.21;1.89]    | 0.0002  | 1.42                                     | [1.14;1.78]    | 0.002   |
| <b>Total asthma quality of life score*</b>                           |             |                |         |                       |                |         |                                          |                |         |
| “Few multimorbidity-related medications” profile                     | 6.08        | ±0.03          | <0.0001 | 6.05                  | ±0.03          | <0.0001 | 6.02                                     | ±0.03          | <0.0001 |
| “Predominantly allergic multimorbidity-related medications” profile  | 5.72        | ±0.03          | <0.0001 | 5.71                  | ±0.03          | <0.0001 | 5.78                                     | ±0.03          | <0.0001 |
| “Predominantly metabolic multimorbidity-related medications” profile | 5.66        | ±0.04          | <0.0001 | 5.72                  | ±0.04          | <0.0001 | 5.67                                     | ±0.04          | <0.0001 |

CI, confidence interval; OR, odds ratio; SD, standard deviation.



**Table E4.** Associations between multimorbidity-related medication profiles identified by latent class analysis and asthma characteristics and asthma adverse events among never-smokers from the Asthma-E3N study.

| Asthma characteristics and adverse asthma events                     | Crude model |                |         | Model adjusted on age |                |         | Model adjusted on asthma treatment level |                |         |
|----------------------------------------------------------------------|-------------|----------------|---------|-----------------------|----------------|---------|------------------------------------------|----------------|---------|
|                                                                      | OR (*β)     | [95%CI] (*±SD) | p-value | OR (*β)               | [95%CI] (*±SD) | p-value | OR (*β)                                  | [95%CI] (*±SD) | p-value |
| <b>Uncontrolled asthma</b>                                           |             |                |         |                       |                |         |                                          |                |         |
| “Few multimorbidity-related medications” profile                     | 1.00        | -              |         | 1.00                  | -              |         | 1.00                                     | -              |         |
| “Predominantly allergic multimorbidity-related medications” profile  | 2.51        | [1.86;3.37]    | <0.0001 | 2.36                  | [1.75;3.18]    | <0.0001 | 1.85                                     | [1.34;2.54]    | 0.0002  |
| “Predominantly metabolic multimorbidity-related medications” profile | 1.47        | [1.03;2.10]    | 0.03    | 1.27                  | [0.88;1.84]    | 0.19    | 1.40                                     | [0.98;2.02]    | 0.06    |
| <b>Asthma exacerbations</b>                                          |             |                |         |                       |                |         |                                          |                |         |
| “Few multimorbidity-related medications” profile                     | 1.00        | -              |         | 1.00                  | -              |         | 1.00                                     | -              |         |
| “Predominantly allergic multimorbidity-related medications” profile  | 1.51        | [1.03;2.20]    | 0.03    | 1.49                  | [1.02;2.19]    | 0.04    | 1.39                                     | [0.96;2.02]    | 0.08    |
| “Predominantly metabolic multimorbidity-related medications” profile | 1.00        | [0.65;1.54]    | 0.98    | 0.99                  | [0.64;1.52]    | 0.96    | 0.99                                     | [0.65;1.53]    | 0.98    |
| <b>Asthma attacks</b>                                                |             |                |         |                       |                |         |                                          |                |         |
| “Few multimorbidity-related medications” profile                     | 1.00        | -              |         | 1.00                  | -              |         | 1.00                                     | -              |         |
| “Predominantly allergic multimorbidity-related medications” profile  | 2.43        | [1.89;3.14]    | <0.0001 | 2.44                  | [1.90;3.15]    | <0.0001 | 2.13                                     | [1.64;2.77]    | <0.0001 |
| “Predominantly metabolic multimorbidity-related medications” profile | 1.24        | [0.92;1.68]    | 0.15    | 1.25                  | [0.92;1.69]    | 0.14    | 1.22                                     | [0.90;1.65]    | 0.19    |
| <b>Total asthma quality of life score*</b>                           |             |                |         |                       |                |         |                                          |                |         |
| “Few multimorbidity-related medications” profile                     | 6.34        | ±0.04          | <0.0001 | 6.30                  | ±0.04          | <0.0001 | 6.28                                     | ±0.04          | <0.0001 |
| “Predominantly allergic multimorbidity-related medications” profile  | 5.75        | ±0.04          | <0.0001 | 5.75                  | ±0.04          | <0.0001 | 5.83                                     | ±0.04          | <0.0001 |
| “Predominantly metabolic multimorbidity-related medications” profile | 6.14        | ±0.05          | <0.0001 | 6.18                  | ±0.05          | <0.0001 | 6.10                                     | ±0.05          | <0.0001 |

CI, confidence interval; OR, odds ratio; SD, standard deviation.

## References

- E1. Yáñez A, Cho SH, Soriano JB, Rosenwasser LJ, Rodrigo GJ, Rabe KF, Peters S, Niimi A, Ledford DK, Katial R, Fabbri LM, Celedón JC, Canonica GW, Busse P, Boulet LP, Baena-Cagnani CE, Hamid Q, Bachert C, Pawankar R, Holgate ST. Asthma in the elderly: what we know and what we have yet to know. *World Allergy Organ J.* 2014;7(1):8.
- E2. Barr RG, Herbstman J, Speizer FE, Camargo CA. Validation of self-reported chronic obstructive pulmonary disease in a cohort study of nurses. *Am J Epidemiol.* 2002;155(10):965-71.
- E3. Global Initiative for Asthma. Global Strategy for Asthma Management and Prevention. [www.ginasthma.org](http://www.ginasthma.org). Date last updated: 2017. Date last accessed: June 13 2017.
- E4. Nathan RA, Sorkness CA, Kosinski M, Schatz M, Li JT, Marcus P, Murray JJ, Pendergraft TB. Development of the asthma control test: a survey for assessing asthma control. *J Allergy Clin Immunol.* 2004;113(1):59-65.
- E5. Juniper EF, Guyatt GH, Ferrie PJ, Griffith LE. Measuring quality of life in asthma. *Am Rev Respir Dis.* 1993;147(4):832-8.
- E6. Nylund KL, Asparouhov T, Muthén BO. Deciding on the number of classes in latent class analysis and growth mixture modeling: a Monte Carlo simulation study. 2007; 14:535-69.
- E7. Graham JW, Olchowski AE, Gilreath TD. How many imputations are really needed? Some practical clarifications of multiple imputation theory. *Prev Sci.* 2007;8(3):206-13.

## Figure Legends

**Figure E1.** Network-based analyses in elderly women with asthma according to disease activity: **a)** network-based analysis in women with current asthma (n=1,305 women randomly selected) and **b)** network-based analysis in women with past asthma (n=1,305). Network graphs were built from all drug classes according to the third level of the ATC classification. Node diameters represent the prevalence of use of each drug class in the population. Edge thicknesses represent the strength of the association between two drug classes estimated by the  $\phi$  coefficient. The statistical significant links between asthma drug classes and other drug classes are highlighted.

**Figure E2.** Multimorbidity-related medication profiles identified by latent class analysis: **a)** “Few multimorbidity-related medications” profile (n=1,885, 43.5%); **b)** “Predominantly allergic multimorbidity-related medications” profile (n=1,419, 32.8%); and **c)** “Predominantly metabolic multimorbidity-related medications” profile (n=1,024, 23.7%).
